# Supplementary material for: Sex differences in brain atrophy in dementia with Lewy bodies
Source: PubMed Central journal article supplement — Alzheimers Dement. 2023 Dec 22;20(3):1815–26. doi: 10.1002/alz.13571 (PMC10947875; doi:10.1002/alz.13571), 2023-12-22
Supplement: NIHMS1959545-supplement-1.pdf [file NIHMS1959545-supplement-1.pdf]

1 **Supplementary Materials**

2 **Supplementary Table 1 Participants from each center**

| Center       | <i>Clinical cohort</i> |            |            | <i>Research-oriented cohort</i> |                 |                |
|--------------|------------------------|------------|------------|---------------------------------|-----------------|----------------|
|              | Total                  | Males      | Females    | Total                           | Males           | Females        |
| Amsterdam    | 68                     | 59         | 9          | 34 (34)                         | 31 (31)         | 3 (3)          |
| Brescia      | 14                     | 8          | 6          |                                 |                 |                |
| Brno         | 7                      | 3          | 4          |                                 |                 |                |
| Chieti       | 24                     | 13         | 11         |                                 |                 |                |
| Essex        | 8                      | 5          | 3          |                                 |                 |                |
| Genova       | 4                      | 1          | 3          |                                 |                 |                |
| Ljubljana    | 21                     | 10         | 11         |                                 |                 |                |
| Mayo Clinic  |                        |            |            | 68                              | 57              | 11             |
| Newcastle    | 24                     | 17         | 7          |                                 |                 |                |
| Prague       | 27                     | 13         | 14         | 29 (13)                         | 14 (7)          | 15 (6)         |
| Reykjavik    | 12                     | 4          | 8          |                                 |                 |                |
| Stavanger    | 42                     | 25         | 17         |                                 |                 |                |
| Stockholm    | 23                     | 15         | 8          |                                 |                 |                |
| Strasbourg   | 46                     | 28         | 18         | 34 (9)                          | 17 (5)          | 17 (4)         |
| Venice       | 7                      | 3          | 4          |                                 |                 |                |
| <b>Total</b> | <b>327</b>             | <b>204</b> | <b>123</b> | <b>165 (56)</b>                 | <b>119 (43)</b> | <b>46 (13)</b> |

3 Center of origin of the participants of the clinical and research-oriented cohorts. In brackets, the number  
 4 of participants shared between clinical and research-oriented cohort.

5

1 **Supplementary Table 2 Demographic characteristics of cognitive unimpaired male and**  
 2 **female participants**

|   |                                   | <i>Research-oriented cohort (N = 164)</i> |                     |                           |
|---|-----------------------------------|-------------------------------------------|---------------------|---------------------------|
|   |                                   | Males                                     | Females             | t-stat ( <i>P</i> -value) |
|   |                                   | (n = 119)                                 | (n = 45)            |                           |
| 5 | Age, mean (SD)                    | 68.73<br>(8.40)                           | 69.89<br>(9.09)     | 0.770 (0.442)             |
|   | Years of education, mean (SD)     | 15.31<br>(2.73)                           | 14.44<br>(2.31)     | 1.886 (0.061)             |
|   | MMSE, mean (SD)                   | 28.40<br>(1.28)                           | 28.58<br>(1.12)     | 0.806 (0.421)             |
|   | TIV (mm <sup>3</sup> ), mean (SD) | 1611.75<br>(124.42)                       | 1390.98<br>(107.33) | 10.511 ( $\leq 0.001$ )   |

6 Abbreviations: CU, cognitive unimpaired; F, females; M, males; MMSE, Mini-Mental State  
 7 Examination; TIV, total intracranial volume.

8

9

1 **Supplementary Table 3 List of MCALT ROIs used in the analyses**

| <b>Cortical ROIs (82)</b> | <b>Subcortical ROIs (12)</b> | <b>Brainstem ROIs (2)</b> |
|---------------------------|------------------------------|---------------------------|
| Precentral L/R            | Hippocampus L/R              | Pons                      |
| Frontal Sup L/R           | Amygdala L/R                 | Dorsal Mesopontine        |
| Frontal Sup Orb L/R       | Caudate L/R                  |                           |
| Frontal Mid L/R           | Pallidum L/R                 |                           |
| Frontal Mid Orb L/R       | Putamen L/R                  |                           |
| Frontal Inf Oper L/R      | Thalamus L/R                 |                           |
| Frontal Inf Tri L/R       |                              |                           |
| Frontal Inf Orb L/R       |                              |                           |
| Rolandic Oper L/R         |                              |                           |
| Supp Motor Area L/R       |                              |                           |
| Olfactory L/R             |                              |                           |
| Frontal Sup Medial L/R    |                              |                           |
| Frontal Med Orb L/R       |                              |                           |
| Rectus L/R                |                              |                           |
| Insula L/R                |                              |                           |
| Cingulum Ant L/R          |                              |                           |
| Cingulum Mid L/R          |                              |                           |
| Calcarine L/R             |                              |                           |
| Cuneus L/R                |                              |                           |
| Lingual L/R               |                              |                           |
| Occipital Sup L/R         |                              |                           |
| Occipital Mid L/R         |                              |                           |
| Occipital Inf L/R         |                              |                           |
| Fusiform L/R              |                              |                           |
| Postcentral L/R           |                              |                           |
| Parietal Sup L/R          |                              |                           |
| Parietal Inf L/R          |                              |                           |
| SupraMarginal L/R         |                              |                           |
| Angular L/R               |                              |                           |
| Precuneus L/R             |                              |                           |
| Paracentral lobule L/R    |                              |                           |
| Heschl L/R                |                              |                           |
| Temporal Sup L/R          |                              |                           |
| Temporal Pole Sup L/R     |                              |                           |
| Temporal Mid L/R          |                              |                           |
| Temporal Pole Mid L/R     |                              |                           |
| Temporal Inf L/R          |                              |                           |
| Entorhinal Cortex L/R     |                              |                           |
| ParaHippocampal L/R       |                              |                           |
| Cingulum Post L/R         |                              |                           |
| Retrosplenial Cortex L/R  |                              |                           |

2 Abbreviations: L, left; MCALT, Mayo Clinic Adult Lifespan Template; R, right; ROI, regions  
 3 of interest.

1 **Supplementary Table 4 Significant sex differences in automated estimations of regional**  
2 **atrophy segmentation in probable DLB**

|                                        | Males             | Females           | <i>F</i> | <i>P</i> -value | Cohen's <i>d</i> | 95% CI       |
|----------------------------------------|-------------------|-------------------|----------|-----------------|------------------|--------------|
| <b><i>Volumes</i></b>                  |                   |                   |          |                 |                  |              |
| Right entorhinal cortex                | 0.027<br>(0.261)  | -0.069<br>(0.181) | 5.225    | 0.024           | 0.40             | [0.05, 0.74] |
| Left middle frontal gyrus orbital part | -0.053<br>(0.567) | 0.136<br>(0.443)  | 4.133    | 0.044           | 0.35             | [0.01, 0.69] |
| Right middle frontal gyrus             | -0.191<br>(2.001) | 0.494<br>(1.833)  | 4.057    | 0.046           | 0.35             | [0.01, 0.69] |
| Left fusiform gyrus                    | -0.097<br>(1.037) | 0.250<br>(0.938)  | 3.901    | 0.050           | 0.34             | [0.00, 0.68] |
| Left middle occipital gyrus            | -0.149<br>(1.442) | 0.386<br>(1.073)  | 5.218    | 0.024           | 0.40             | [0.05, 0.74] |
| Left middle temporal gyrus             | -0.151<br>(1.485) | 0.390<br>(1.485)  | 4.456    | 0.036           | 0.37             | [0.02, 0.71] |
| Right supramarginal gyrus              | -0.097<br>(0.686) | 0.251<br>(0.805)  | 7.708    | 0.006           | 0.48             | [0.14, 0.83] |
| <b><i>Mean cortical thickness</i></b>  |                   |                   |          |                 |                  |              |
| Left olfactory cortex                  | 0.027<br>(0.262)  | -0.070<br>(0.282) | 4.310    | 0.039           | 0.36             | [0.02, 0.70] |
| Right olfactory cortex                 | 0.030<br>(0.266)  | -0.079<br>(0.313) | 5.012    | 0.027           | 0.39             | [0.05, 0.73] |

3 One-way analysis of variance (ANOVA) was used with each region of interest (ROI) as the dependent  
4 variable and sex as the independent variable. Residuals of volumes and cortical thickness expressed as  
5 mean (SD). The residuals were obtained from multiple linear regression models with center and age as the  
6 predictors, including estimated total intracranial volume as an extra predictor for volumes. Cohen's *d* was  
7 used as an estimate of the effect size.

8 Abbreviations: CI, confidence interval.

9

1  
2  
3  
4  
5  
6  
7  
8  
9

**Supplementary Table 5 Significant correlations between regional atrophy and clinical measures in probable DLB male patients**

|                                               | <b>Males</b><br>r ( <i>P</i> -value) | <b>Females</b><br>r ( <i>P</i> -value) |
|-----------------------------------------------|--------------------------------------|----------------------------------------|
| <b>MMSE score</b>                             |                                      |                                        |
| Left middle temporal gyrus volume             | 0.252 (0.006)                        | 0.223 (0.140)                          |
| Left olfactory cortex thickness               | 0.281 (0.002)                        | -0.014 (0.925)                         |
| Right olfactory cortex thickness              | 0.199 (0.032)                        | -0.001 (0.993)                         |
| Left anterior cingulum volume                 | 0.193 (0.038)                        | -0.267 (0.076)                         |
| Right fusiform gyrus volume                   | 0.234 (0.010)                        | 0.058 (0.703)                          |
| <b>Presence of visual hallucinations</b>      |                                      |                                        |
| Left middle frontal gyrus orbital part volume | -0.196 (0.035)                       | 0.191 (0.207)                          |
| Left olfactory cortex thickness               | -0.221 (0.017)                       | 0.125 (0.406)                          |

Correlation analyses were computed for the association of regions of interest (ROIs) showing significant sex differences or sex-by-age interactions in DLB patients with MMSE scores (i.e., Pearson correlations) and the presence of visual hallucinations (i.e., point biserial correlations).

Abbreviations: MMSE, Mini-Mental State Examination.
